# Supplementary material
Source: Elsevier journal article supplement (https://www.sciencedirect.com/science/article/pii/S2174204919302302)
Supplement: mmc1 [file S2174204919302302:mmc1.docx]

# Supplementary Table 1

| Multiple regression model for changes in Lp(a) levels between initial and final measurements. Patients who died were excluded (optimized solution). | | |
| --- | --- | --- |
| Variables | Regression coefficient (B) | p |
| Statins | -10.635 | <0.001 |
| Antiplatelets | -4.786 | 0.001 |
| Allopurinol | -5.376 | <0.001 |
| Antidepressants | -4.367 | 0.007 |
| Model p-value <0.001. Adjusted R2=0.134. | | |
